# Supplementary material
Source: publisher site journal article supplement (https://www.spandidos-publications.com/4596/downloadSupplementary)
Supplement: Supplementary file 1 [file downloadSupplementary]

## Sheet: Sample information
Table SI. Sample information
Use	Sample NO.	Plasma		Gender	Age	Stage
		Pre-radiotherapy	Post-radiotherapy
1. Exosome characterzition(n=1)	37892	37892-1	37892-6	female	43	II
2.Exosome miRNA sequencing(n=3)	38380	38380-1	38380-6	female	42	II
	38632	38632-1	38632-6	female	41	II
	38930	38930-1	38930-6	female	40	II
3.Exosome miRNA qRT-PCR(n=3)	38912	38912-1	38912-6	female	42	II
	38783	38783-1	38912-6	female	43	II
	39221	39221-1	39221-6	female	43	II
	Sample NO.	Tissue		Gender	Age	Stage
		Pre-radiotherapy	Post-radiotherapy
4.HE assay (n=3)	38380	38380-1	38380-6	female	42	II
	38632	38632-1	38632-6	female	41	II
	38930	38930-1	38930-6	female	40	II
